# Supplementary material
Source: PubMed Central journal article supplement (PMC7299235)

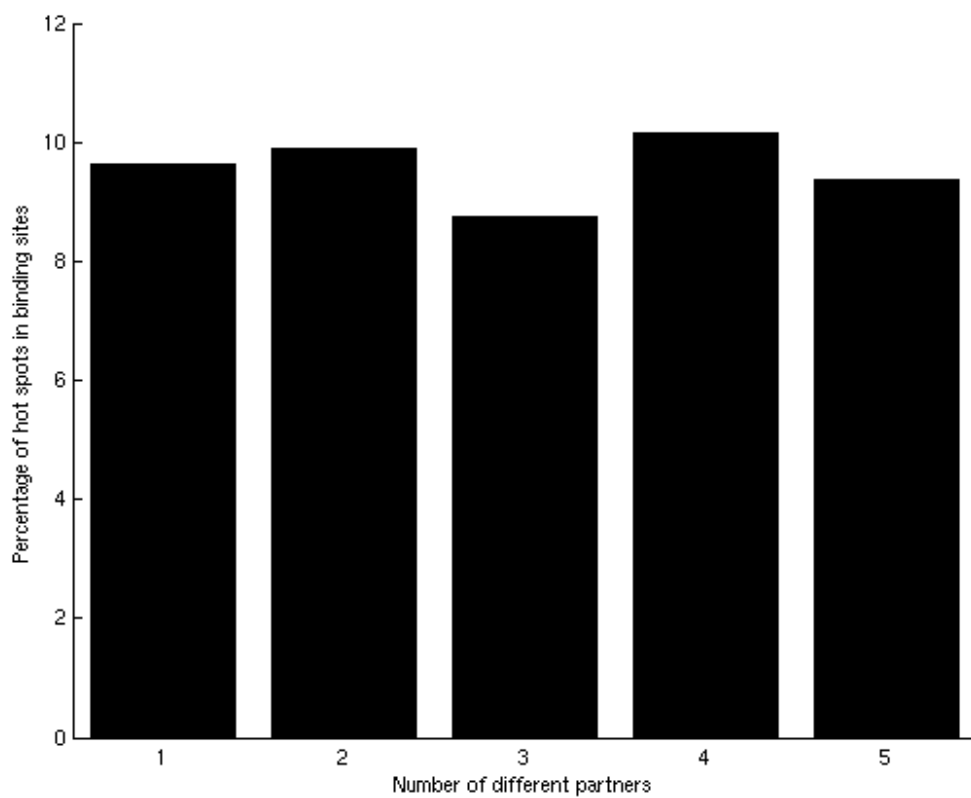

**Figure S1**

Supplement: NIHMS147156-supplement-Supp_Fig_S1.pdf [file NIHMS147156-supplement-Supp_Fig_S1.pdf]

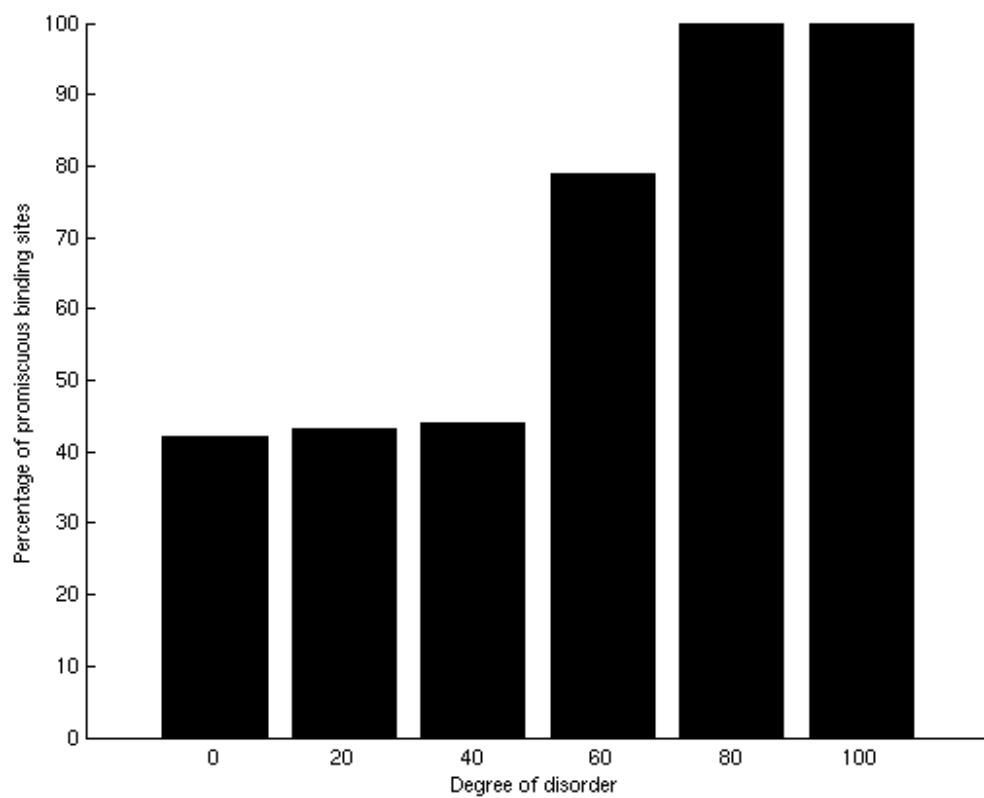

**Figure S2**

Supplement: NIHMS147156-supplement-Supp_Fig_S2.pdf [file NIHMS147156-supplement-Supp_Fig_S2.pdf]

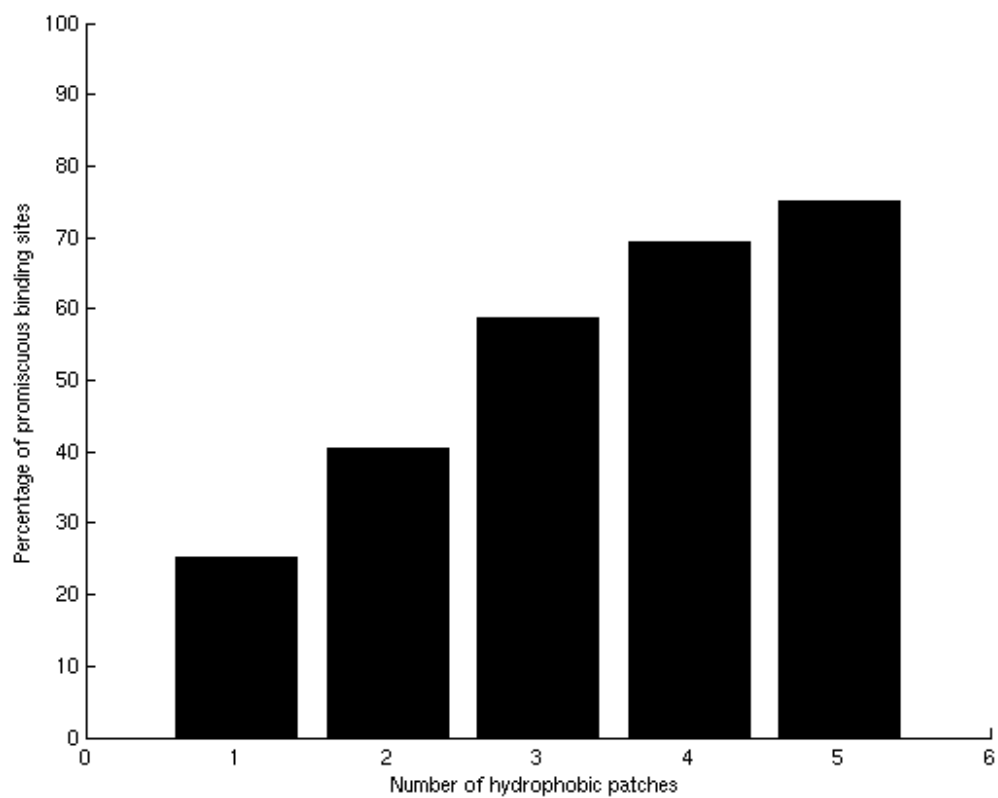

**Figure S3**

Supplement: NIHMS147156-supplement-Supp_Fig_S3.pdf [file NIHMS147156-supplement-Supp_Fig_S3.pdf]
